1 **TITLE: High-throughput isolation and culture of human gut bacteria with droplet**  
2 **microfluidics**

3 **AUTHORS:** Max M Villa<sup>†‡^</sup>, Rachael J Bloom<sup>\*‡^</sup>, Justin D Silverman<sup>§||‡</sup>, Heather K  
4 Durand<sup>†‡</sup>, Sharon Jiang<sup>†‡</sup>, Anchi Wu<sup>°</sup>, Shuqiang Huang<sup>‡°\*\*</sup>, Lingchong You<sup>‡°</sup>, and  
5 Lawrence A David<sup>†‡§°</sup>

6

7 **AUTHOR AFFILIATIONS:**

8 \*University Program in Genetics and Genomics, Duke University, Durham, NC, 27708  
9 † Department of Molecular Genetics and Microbiology, Duke University, Durham, NC  
10 27708  
11 ‡ Center for Genomic and Computational Biology, Duke University, Durham, NC 27708  
12 § Program in Computational Biology and Bioinformatics, Duke University, Durham, NC  
13 27708  
14 || Medical Scientist Training Program, Duke University, Durham, NC 27708  
15 ° Department of Biomedical Engineering, Duke University, Durham, NC 27708  
16 \*\*Institute of Synthetic Biology, Shenzhen Institutes of Advanced Technology, Chinese  
17 Academy of Sciences, Shenzhen 518055, People's Republic of China

18

19

20 ^ denotes equal first-authorship

21

22 **CORRESPONDING AUTHOR:**

23

24 Lawrence A David  
25 CIEMAS, Room 2171  
26 101 Science Drive, Box 3382  
27 Durham, NC 27708  
28 919-668-5388  
29 lawrence.david@duke.edu

30 **Abstract**

31 Isolation and culture of gut bacteria enable testing for microbial roles in disease and  
32 may also lead to novel therapeutics. However, the diversity of human gut microbial  
33 communities (microbiota) impedes comprehensive experimental studies of individual  
34 bacterial taxa. Here, we combine advances in droplet microfluidics and high-throughput  
35 DNA sequencing to develop a platform for isolating and assaying microbiota members  
36 in picoliter droplets (MicDrop). MicDrop can be used to create millions of distinct  
37 bacterial colonies in a single experiment while using off-the-shelf parts compact enough  
38 to fit in an anaerobic chamber. In proof-of-concept experiments, we used the platform to  
39 characterize inter-individual metabolic variation among hundreds of polysaccharide-  
40 degrading gut bacteria from nine stool donors. We also used MicDrop to test the  
41 hypothesis that growth kinetics of individual gut bacterial taxa are associated with long-  
42 term community dynamics in an artificial gut. These demonstrations suggest the  
43 MicDrop platform could support future diagnostic efforts to personalize microbiota-  
44 directed therapies, as well as to provide comprehensive new insights into the ecology of  
45 human gut microbiota.

## 46 **Introduction**

47 Bacterial culture was among the first techniques used to study human gut microbiota<sup>1</sup>.  
48 Bacterial isolation efforts beginning in the early 1900s identified key enteric genera such  
49 as *Bacteroides*, *Bifidobacterium*, and *Bacillus*<sup>2</sup>. Microbes isolated since then have  
50 served as crucial reagents for experiments. Gut bacterial isolates allow testing causal  
51 roles for specific microbes in animal models of metabolic and auto-immune disorders<sup>3-5</sup>.  
52 Bacterial isolates can also be genetically modified and tested *in vitro* to identify  
53 enzymatic machinery in processes like the fermentation of dietary fiber<sup>6</sup>, and cocktails of  
54 cultured bacteria are being explored as therapeutics for *C. difficile* infections and  
55 cancer<sup>7-9</sup>.

56 Yet a key challenge for current microbiota culturing efforts has been keeping  
57 pace with increasing knowledge and interest in gut microbial diversity. Culture-  
58 independent methods based on high-throughput 16S rRNA sequencing have revealed  
59 the average individual harbors hundreds of distinct enteric bacterial strains<sup>10-13</sup>.  
60 Moreover, unrelated individuals likely share no more than ~30% of bacterial strains<sup>14</sup>.  
61 Prevailing culture techniques do not scale to the diversity of microbes spanning human  
62 populations. Because most taxa are rare, exhaustive capture of bacterial species from  
63 even a single stool sample requires laborious spotting of thousands of bacterial  
64 colonies<sup>15,16</sup>. To reduce the human effort needed for such experiments, state-of-the-art  
65 culture assays leverage plate and liquid handling robots; but, even these automated  
66 efforts tend to be limited to tens of strains<sup>17,18</sup>. This limitation stems in part from the  
67 physical constraints of typical plate-based culture methods, which grow bacteria in wells  
68 ranging from centimeters to millimeters in diameter. Even relying on 96- and 384-well

69 plates, conventional large-scale culture efforts may require loading and handling dozens  
70 of plates under anaerobic conditions<sup>18</sup>.

71 An alternative approach is to culture bacteria in small volumes (nano- to pico-  
72 liters) by separating microbes into microscale wells. Devices composed of thousands of  
73 such wells have been used to culture both lab strains of bacteria and fungi<sup>19</sup>, as well as  
74 isolate previously uncultured bacteria from the gut and soil<sup>20,21</sup>. Even higher-throughput  
75 experiments are possible by compartmentalizing microbes in droplets of media that are  
76 tens to hundreds of microns in diameter and separated by immiscible oils and  
77 engineered surfactants<sup>22,23</sup>. Because droplets are not limited by the need to  
78 microfabricate physical wells or channels, millions of distinct culture volumes can be  
79 created on the order of minutes. Droplet techniques have so far been used to isolate  
80 uncultured microbes from seawater and soil communities<sup>20,24,25</sup>, assess microbial cross-  
81 feeding<sup>26</sup>, track population dynamics of individual bacteria<sup>27</sup>, and examine antibiotic  
82 sensitivity and commensal-pathogen interactions of human gut and oral microbiota<sup>28,29</sup>.  
83 Still, existing droplet microfluidic approaches for assaying bacteria have required  
84 combining complex emulsion techniques (water-oil-water) with flow cytometers or  
85 custom on-chip droplet sorting devices. These protocol requirements limit the  
86 accessibility of droplet technologies for bacterial assays and in their present form  
87 require equipment that does not fit into typical anaerobic chambers, which are needed  
88 to culture human gut bacteria<sup>30</sup>.

89 Here, we developed a platform to isolate and culture bacteria from human gut  
90 microbiota in droplets (MicDrop) using accessible techniques and equipment. A key  
91 challenge our method addresses is how to measure the growth of isolates within distinct

92 microfluidic droplets. To accomplish this, we rely on 16S rRNA as intrinsic DNA  
93 barcodes that are shared between droplets carrying the same bacterial taxa, which we  
94 refer to here as a sequence variant or SV<sup>31</sup>. This approach in turn allows us to measure  
95 isolate growth in droplets without the need for double-emulsion techniques or droplet  
96 sorting. Instead, we combine single-emulsion (water-in-oil) microfluidic droplet protocols  
97 with molecular techniques (qPCR and 16S rRNA sequencing). These simplified  
98 protocols allow us to employ off-the-shelf microfluidic pumps and chips, which are  
99 compact enough to fit within typical anaerobic chambers. Using MicDrop, we  
100 characterized dietary polysaccharide metabolism among hundreds of gut bacteria from  
101 nine individuals. We then employed MicDrop to generate growth curves for dozens of  
102 distinct SVs in a single experiment, which we in turn used to investigate long-term  
103 microbiota dynamics of an artificial human gut. Together, these findings showcase the  
104 potential for microfluidic droplet techniques to characterize the growth and function of  
105 individual bacterial strains from complex gut microbial communities in high-throughput.  
106  
107

## 108 **Results**

### 109 **MicDrop: a platform for culturing human gut microbiota in droplets**

110 To isolate and culture individual gut bacteria from human gut microbiota, we  
111 merged concepts from prior microfluidic droplet protocols with high-throughput DNA  
112 sequencing (Fig. 1; Experimental Procedures). Our protocol first randomly encapsulates  
113 individual bacterial cells from gut microbiota into picoliter-sized droplets (Fig. 1A). Gut  
114 microbiota samples are diluted before encapsulation using the Poisson distribution at a  
115 loading concentration that optimizes the number of droplets loaded with cells (~10-26%)  
116 against the number of droplets loaded with more than one microbe (~95-86% of loaded  
117 droplets contain single cells) (Supplementary Fig. 1)<sup>32</sup>. Since many gut bacteria are  
118 obligate anaerobes, encapsulation takes place in an anaerobic chamber and droplets  
119 are subsequently incubated under anaerobic conditions (Supplementary Fig. 2). To  
120 track SV growth, we can avoid having to identify and sort bacteria by assuming that  
121 droplets are either empty or loaded with clonal isolates whose progeny share the same  
122 16S ribosomal rRNA (rRNA) sequence, meaning genomic material accumulating across  
123 all droplets reflects the growth of SVs grown in isolation (Fig. 1A-D). We therefore track  
124 isolate growth in droplets at a given time point using bulk bacterial DNA extraction  
125 without droplet sorting, followed by DNA sequencing and total quantification (qPCR) of  
126 16S rRNA. The product of relative SV levels from 16S rRNA sequencing and total 16S  
127 rRNA levels yields an estimate of the absolute levels of each SV across all droplets at  
128 the time of sampling.

129

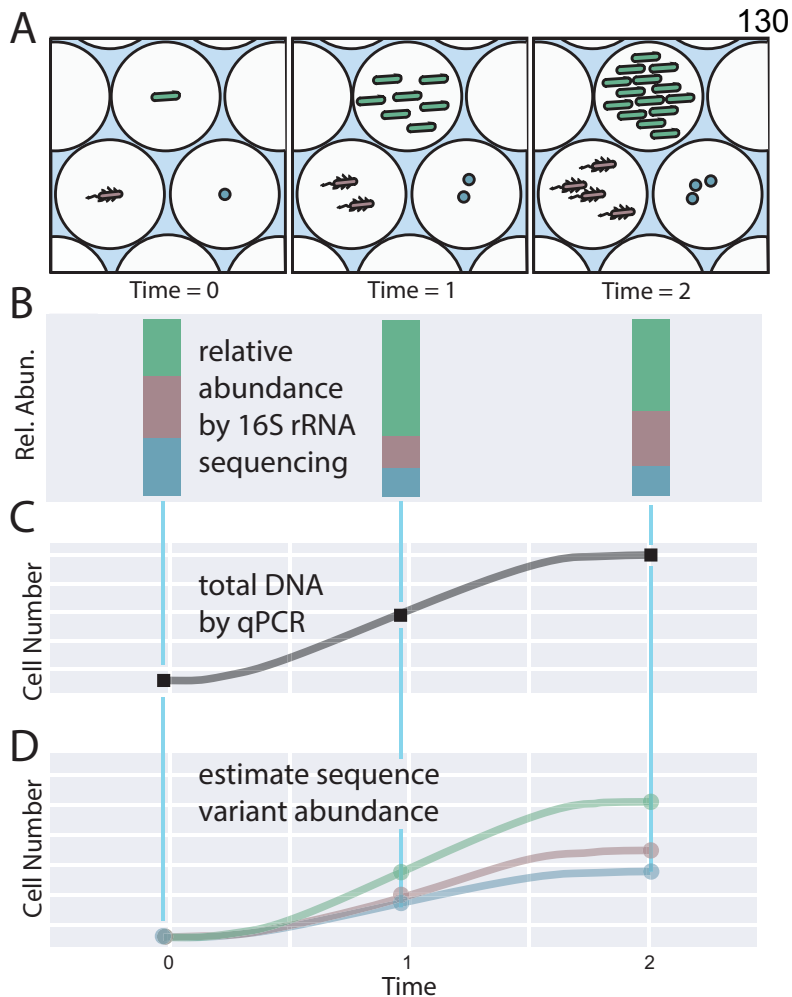

131  
132 **Figure 1. MicDrop concept** (A) Schematic of bacterial loading and growth in droplets  
133 over time. Bulk DNA is collected across all droplets and (B) the 16S rRNA gene is  
134 sequenced to establish the relative abundance of each sequence variant. (C) qPCR is  
135 used on the same samples to estimate the total abundance of all bacteria. Relative  
136 abundances are then multiplied by total bacterial levels to estimate sequence variant  
137 abundances (D).  
138  
139

140 To explore the feasibility of the MicDrop platform, we initially examined bacterial  
141 replication and isolation in droplets, as well as the use of DNA sequencing to track  
142 bacterial levels. We found aerobic monocultures of fluorescent *Escherichia coli*  
143 replicated in droplets in a qualitative manner that resembled growth on conventional  
144 Petri dishes (Supplementary Fig. 3). Droplet stability experiments suggested that

145 bacteria could be studied in droplets for at least 5 days (Supplementary Fig. 4). Next,  
146 microscopy showed droplets could be used to segregate clonal isolate populations with  
147 distinct morphology and motility out of mixed microbial communities (Supplementary  
148 Fig. 5). Human fecal microbiota isolated and cultured in droplets exhibited 2.6 times  
149 more diversity than when grown in mixed conditions (Supplementary Fig. 6), which is  
150 consistent with the hypothesis that droplet isolation enables slow-growing microbes to  
151 be sheltered from competition with fast-growing bacteria<sup>20</sup>. Last, we found DNA-based  
152 techniques could be used to track bacterial levels in droplets. Quantitative growth  
153 measurements using qPCR of the 16S rRNA gene sampled every two hours from liquid  
154 cultures were also similar to *E. coli* grown on plates ( $\rho=0.95$ ,  $p=8.7e-9$ ; Spearman  
155 correlation; Supplementary Fig. 7). Next, using DNA sequencing, we analyzed a mixture  
156 of 10 bacterial strains that were isolated using MicDrop and grown under varying  
157 antibiotic conditions for 24 hours. We found that resulting bacterial DNA levels in  
158 droplets corresponded to isolates' optical densities in reference well-plates  
159 (accuracy=75%; Supplementary Fig. 8).

160

### 161 **A droplet assay for prebiotic consumption by human gut microbes**

162 To demonstrate how MicDrop could be applied to problems in human gut microbiology,  
163 we used the platform to measure bacterial utilization of carbohydrates. In typical  
164 carbohydrate utilization screens, bacteria are cultured in defined media containing a  
165 carbohydrate as the sole carbon source<sup>17,33</sup>. Microbes that replicate are assumed to be  
166 capable of utilizing the carbohydrate and are termed "primary degraders"<sup>34,35</sup>. The  
167 biology of primary degraders is of increasing interest because bacterial metabolism of



168 select indigestible carbohydrates (prebiotics) leads to the growth and activity of gut  
169 microbes with multiple beneficial impacts on host health<sup>17,36-40</sup>. Still, bacterial prebiotic  
170 metabolism is incompletely understood, particularly with regards to the origins of wide  
171 inter-individual variation in microbiota metabolic potential<sup>41-43</sup>.

172 To explore how the MicDrop platform could assay bacterial prebiotic metabolism  
173 (Fig. 2A), we first loaded a previously characterized type strain *Bacteroides*  
174 *thetaiotaomicron* ATCC 29148 into microfluidic droplets and standard 96-well plates.  
175 Consistent with both prior studies<sup>17</sup> and our well-plate experiments, *B. thetaiotaomicron*  
176 ATCC 29148 replicated in droplets on pullulan and levan, but not on laminarin or a no  
177 carbohydrate control (Fig. 2B). We next tested how the MicDrop prebiotic assay  
178 performed using artificial microbial communities assembled from seven human gut  
179 isolates (Fig. 2E). Using 96-well plate experiments as our reference (Fig. 2C & 2D,  
180 Supplementary Fig. 9), we found the sensitivity, specificity, and false discovery rate of  
181 the MicDrop prebiotic assay to be 80%, 93%, and 9%, respectively (Supplementary  
182 Table 1). Finally, to assess the reproducibility of the MicDrop prebiotic assay, we used  
183 the same frozen fecal sample to compare the results of two separate experimental  
184 sessions. We observed higher correlation between replicates from the same session  
185 ( $\rho = 0.73-0.78$ ,  $p < 0.0001$ , Spearman correlation) than between replicates across  
186 sessions ( $\rho = 0.57$ ,  $p = 1.67e-17$ , Spearman correlation). One explanation for the  
187 difference in correlation is that microbial communities re-assembled in different  
188 configurations each time microbiota was revived from frozen stool<sup>44</sup>. Indeed, controlling  
189 for microbiota differences between droplet inocula elevated the between session  
190 correlation ( $\rho = 0.74$ ,  $p = 5.14e-19$ , Spearman correlation, Fig. 2F).

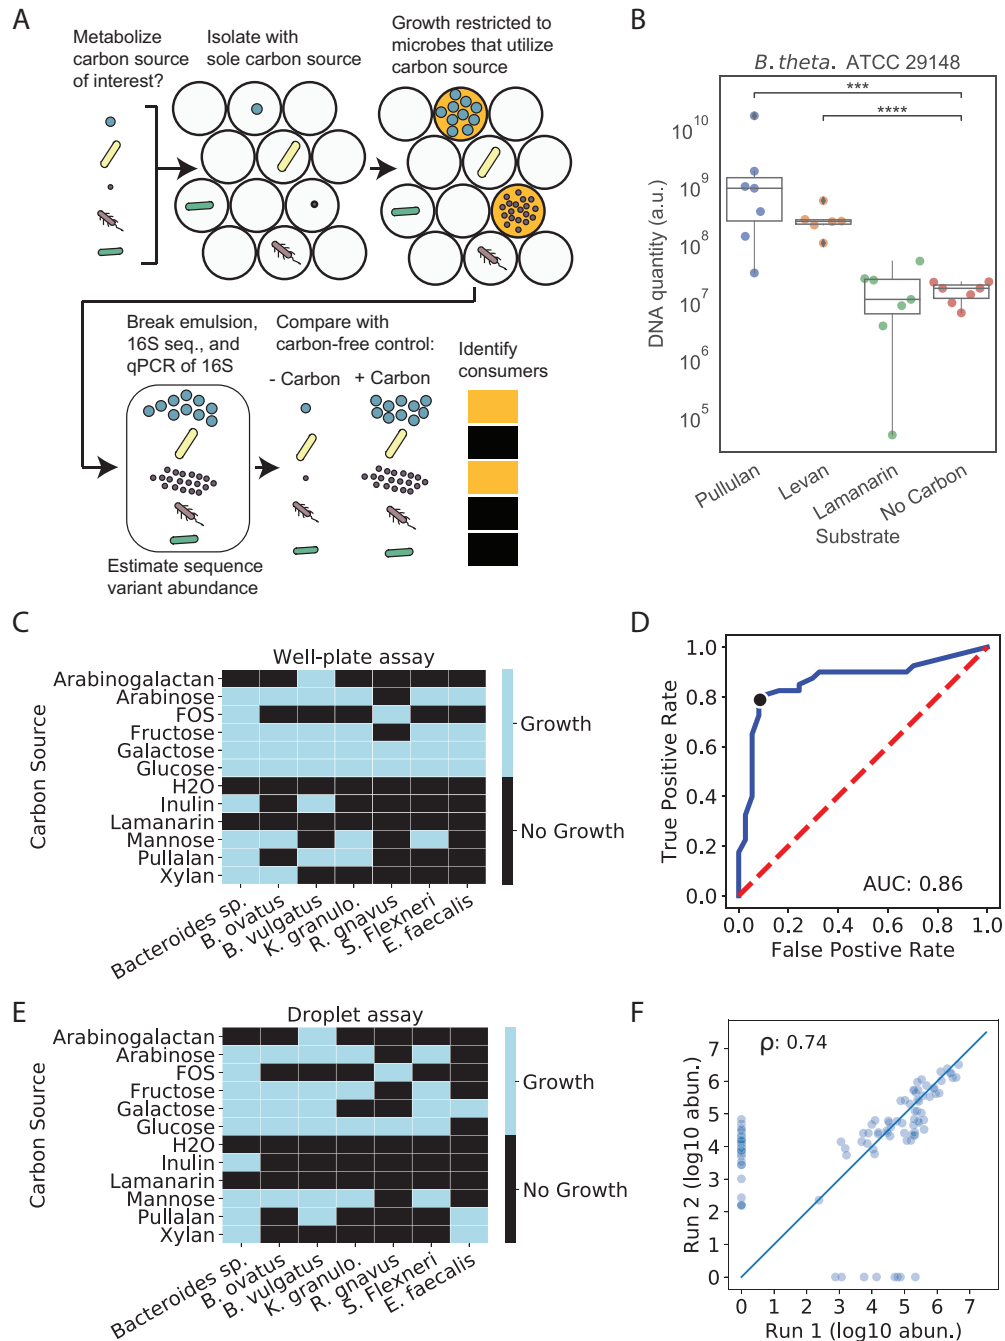

191  
192 **Figure 2. A prebiotic utilization screen based on the MicDrop platform**  
193 (A) Schematic of MicDrop prebiotic assay. (B) Droplet monoculture growth of *B.*  
194 *thetaiotaomicron* in microfluidic droplets measured by qPCR. (C) Results of 96-well  
195 plate growth of gut bacterial isolates across 11 carbohydrates. (D) ROC curve of  
196 MicDrop assay results at different growth threshold cut-offs using (C) as a reference.  
197 The black dot indicates the growth threshold that maximizes the true positive rate while  
198 minimizing the false positive rate, depicted in (E). (F) Correlation between two different  
199 MicDrop sessions (each carried out in triplicate) on the same frozen fecal sample and  
200 five different carbohydrates. Points indicate median growth of different SVs across each  
201 experimental session.

## 202 **Identifying primary degraders from human guts across multiple prebiotics**

203 We next applied the MicDrop prebiotic assay to microbiota from nine healthy  
204 human stool donors. We assayed growth on three consumer-grade prebiotics (inulin,  
205 galacto-oligosaccharides (GOS), and dextrin) and a lab-grade prebiotic (xylan). Out of  
206 the 588 SVs detected across donor stool samples, MicDrop identified a total of 285  
207 primary degraders that grew on at least one of the screened prebiotics (Fig. 3A).  
208 Prebiotic utilization patterns of primary degraders were similar to those of matched  
209 bacterial strains in a reference database of microbial carbohydrate utilization<sup>45,46</sup>.  
210 Among the instances when matched bacteria were annotated as consuming a prebiotic  
211 in the database, 86% were detected by MicDrop ( $p < 0.001$ ; permutation test). Still, we  
212 did find that 52% of instances when MicDrop indicated a primary degrader to consume  
213 a prebiotic were not reported for matched bacteria in the database ( $p = 0.34$ ; permutation  
214 test), which may in part reflect incomplete enumeration of bacterial carbohydrate  
215 utilization in the reference.

216 We next explored the hypothesis that differences in the presence or absence of  
217 primary degraders could drive inter-individual variation in human prebiotic response.  
218 Evidence arguing against this hypothesis included observing that multiple SVs capable  
219 of growing on the tested prebiotics were present in all subjects (median:  $12.5 \pm 6.1$ );  
220 Fig. 3B, Supplementary Table 2). Additionally, primary degraders were more likely to be  
221 shared between individuals than SVs not identified as primary degraders in stool  
222 samples ( $p = 0.00122$ , Chi-square test). Concordant with human studies showing that  
223 even individuals with low prebiotic fermentation *in vivo* exhibit at least some prebiotic

224 fermentative capacity *in vitro*<sup>35</sup>, our findings support the hypothesis that primary  
225 degraders are found across most individuals.

226         Still, we also found evidence for inter-individual variation in primary degrader  
227 composition and abundance. We observed differences in the richness of primary  
228 degraders across subjects ( $p < 0.001$ , Two-way ANOVA; Fig. 3B). We also found subject  
229 identity explained more variation ( $R^2 = 0.30$ , PERMANOVA; Supplementary Table 3) than  
230 prebiotic type ( $R^2 = 0.16$ , PERMANOVA; Supplementary Table 3) in overall primary  
231 degrader growth. Last, we observed differences in the relative abundance of primary  
232 degraders in inoculating fecal communities ( $p < 0.0001$ , Two-way ANOVA; Fig. 3C).  
233 Thus, while primary degraders are likely present in most individuals, differences in  
234 polysaccharide metabolism may be due to inter-individual variation in primary degrader  
235 abundance in the gut<sup>41,42</sup>.

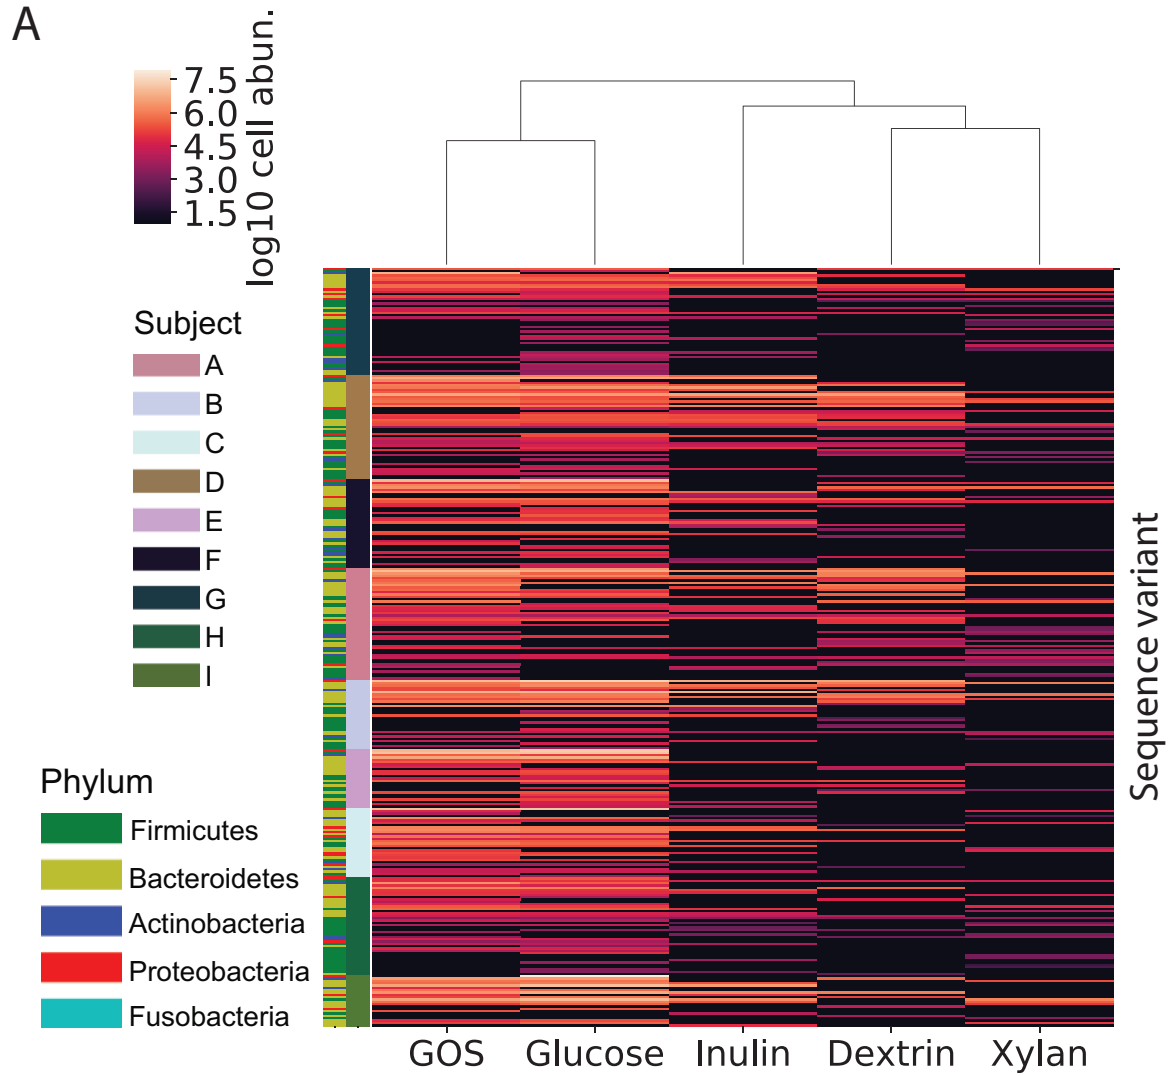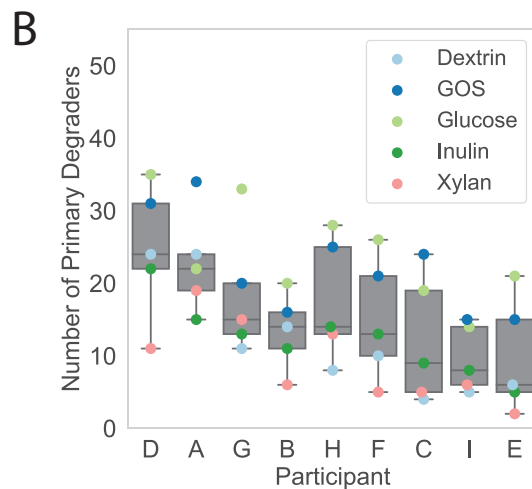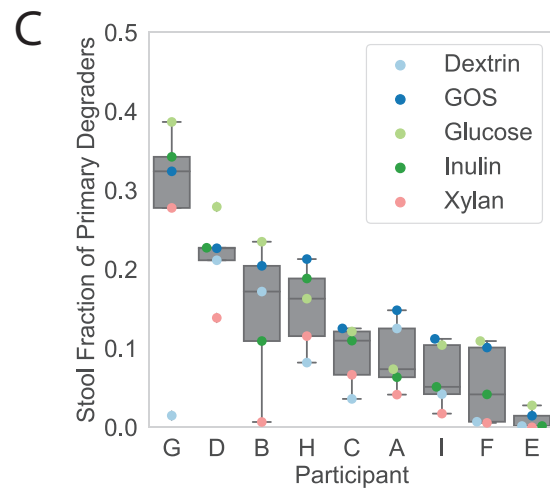

236

237

238

239

**Figure 3. MicDrop prebiotic assay carried out on fecal samples from nine individuals.** (A) Microbial carbohydrate preferences for 328 SVs from nine healthy human donors. Of these SVs, 285 grew on at least one of the prebiotics (*i.e.* GOS,

240 inulin, dextrin, or xylan). (B) The number of primary degraders detected by MicDrop and  
241 (C) the relative abundance of primary degraders in stool samples differed by participant  
242 and prebiotic ( $p < 0.001$ , Two-way ANOVA). Participant orderings in (B) and (C) are  
243 sorted by median values.

244  
245

## 246 **High-throughput estimation of growth dynamics of human gut microbiota**

247         In a second set of demonstration experiments, we used the MicDrop platform to  
248 explore the dynamics of human gut microbiota in artificial gut systems. Such systems  
249 have been used when *in vivo* microbiota research is challenging, including measuring  
250 the effects of nutrition on the infant gut, systematic antibiotic testing, and investigating  
251 chemotherapy-induced dysbioses<sup>47,48,49</sup>. Still, a recurring challenge of artificial gut  
252 models has been their inability to completely reconstruct *in vivo* microbial communities.  
253 After inoculation, these models often decrease in diversity within 24 hours<sup>50-52</sup>, and as  
254 little as 15% of the starting community may ultimately remain after a week of culture<sup>53</sup>. A  
255 potential explanation for part of this diversity loss is that bacteria are sensitive to media  
256 conditions: studies using individual gut bacterial strains show growth can be affected by  
257 even a single medium component<sup>54</sup>; and, varying media used in artificial guts leads to  
258 broad scale changes in microbial community structure<sup>55,56</sup>. Still, the hypothesis that  
259 individual gut microbes' suitability to media is associated with their long-term  
260 persistence in artificial gut models has not been fully explored, likely due in part to the  
261 challenges of isolating and assaying each component species in these communities.

262         To test the hypothesis that growth of individual microbial SVs in a particular  
263 medium would correspond to SV persistence in an artificial gut setting, we used stool  
264 from a healthy human donor to inoculate a continuous flow bioreactor system we have  
265 used in past gut microbial ecology studies<sup>57,58</sup>. The artificial gut was supplied with

266 modified Gifu Anaerobic Medium (mGAM)<sup>59</sup>, which features a variety of carbon and  
267 nitrogen sources, as well as extra amino acids, vitamin K, and hemin. We chose mGAM  
268 because it enables a wide growth of mammalian gut bacteria<sup>54,59</sup>. Yet, despite this  
269 choice of medium, microbiota dynamics in the artificial gut exhibited the same loss in  
270 diversity observed in prior studies (Supplementary Fig. 10)<sup>50,53</sup>. At the end of two weeks  
271 of culture, only 23% and 18% of inoculating bacteria genera and SVs, respectively,  
272 were still detected in the artificial gut (Supplementary Table 4).

273         A fresh stool sample from the same donor used to inoculate the artificial gut was  
274 then assayed by the MicDrop platform. To additionally demonstrate the potential for  
275 MicDrop to assess the kinetics of bacterial growth over time, we created replicate  
276 droplet populations and destructively sampled them at hourly intervals for the first 24  
277 hours, and daily for four subsequent days after inoculation. Among the resulting time  
278 series, 94 SVs were detectable in droplets, meaning they appeared in >5 time points;  
279 Table 1, Supplementary Fig. 11). These SVs included representatives from the major  
280 human gut bacterial phyla (the Actinobacteria, Bacteroidetes, Firmicutes, and  
281 Proteobacteria) and represented 76% of the inoculum's SVs, a proportion approaching  
282 prior culture efforts using mGAM medium<sup>59</sup>. Of the detectable SVs, we then measured  
283 how many exhibited evidence for growth in droplets. We defined a cut-off for growth as  
284 inferred doublings of at least 2.14 times ( $\Delta \ln(\text{SV DNA abundance}) \geq 1.48$ ) based on our  
285 antibiotic-based control experiments (Supplementary Fig. 8). A total of 34 SVs were  
286 defined as growing (Fig. 4A), which accounted for 25% of the inoculum's SVs. Of the  
287 SVs with positive growth, 12 SVs were not detected by sequencing in the inoculum,  
288 which suggests they could be laboratory contaminants. Still, these SVs resemble known

289 gut bacteria (Supplementary Table 5) and may alternatively represent rare microbes  
290 that require culture to be detected, which is a previously reported phenomenon<sup>60</sup>.

291 **Table 1.** Number and fraction of microbes from a human stool sample cultured by  
292 MicDrop in mGAM medium. SVs were considered as ‘detected’ if present in more than  
293 five longitudinal measurement. ‘Growth’ was defined by an inferred number of doublings  
294 equal or greater than 2.14.  
295

| Taxonomic level         | Taxa in inoculum | Taxa detected in droplets | Taxa in inoculum & detected in droplets | Fraction of inoculum detected in droplets | Taxa grew in droplets | Taxa in inoculum & grew in droplets | Fraction of inoculum that grew in droplets |
|-------------------------|------------------|---------------------------|-----------------------------------------|-------------------------------------------|-----------------------|-------------------------------------|--------------------------------------------|
| <b>Phylum</b>           | 4                | 5                         | 4                                       | 1.00                                      | 5                     | 4                                   | 1.00                                       |
| <b>Class</b>            | 10               | 11                        | 10                                      | 1.00                                      | 7                     | 5                                   | 0.50                                       |
| <b>Order</b>            | 10               | 14                        | 10                                      | 1.00                                      | 8                     | 5                                   | 0.50                                       |
| <b>Family</b>           | 17               | 21                        | 16                                      | 0.94                                      | 13                    | 7                                   | 0.41                                       |
| <b>Genus</b>            | 56               | 53                        | 40                                      | 0.71                                      | 20                    | 13                                  | 0.23                                       |
| <b>Sequence Variant</b> | 89               | 94                        | 68                                      | 0.76                                      | 34                    | 22                                  | 0.25                                       |



296

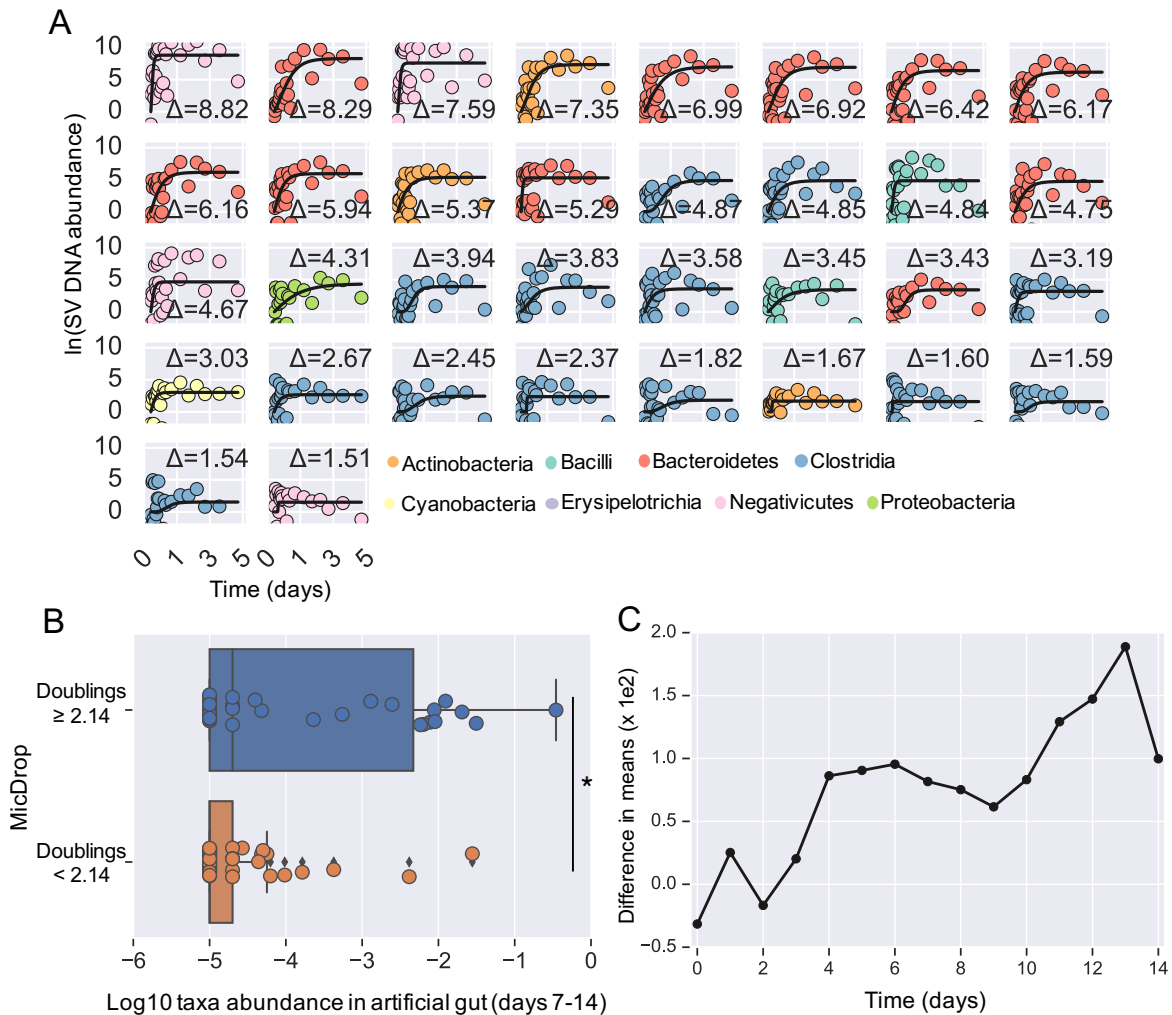

297

298

299 **Figure 4. Comparison of SV growth kinetics and persistence in an artificial gut.**

300 (A) Abundance over time of SVs in MicDrop from a fresh human fecal sample. Modified

301 Gompertz growth curves are fit to time-series. SVs are colored by taxonomy and sorted

302 according to total growth (curve asymptote height; indicated by  $\Delta$ ), which is denoted on

303 each sub-plot. Only SVs inferred to double at least 2.14 times were considering growing and

304 are shown ( $\ln(\Delta \text{ SV DNA abundance}) \geq 1.48$ ; threshold determined using control

305 experiments in Supplementary Fig. 8). To ease viewing, curves are shifted vertically so

306 y-intercepts are at the origin. (B) Long-term abundance of SVs in an artificial gut

307 (grouped across days 7-14) grouped by whether SVs were identified by MicDrop as

308 growing (doubling  $\geq 2.14$  times) or non-growing doubling  $< 2.14$  times) (Mann-Whitney

309 U,  $p < 0.02$ ). (C) Differences in mean abundances of growing and non-growing SVs

310 increased over time in an artificial gut system ( $\rho = 0.80$ ,  $p < 0.0004$ , Spearman

311 correlation).

312

313           The growth of SVs measured with MicDrop were ultimately associated with SV  
314 dynamics in the artificial gut. Such associations were not apparent on short-time scales  
315 (i.e. 1-5 days after inoculation), which is consistent with the notion that non-growing SVs  
316 require several days to wash out of an artificial gut after inoculation. However, from day  
317 7-14 of the artificial gut experiment, we observed elevated abundances among artificial  
318 gut SVs that grew in the MicDrop platform (inferred doublings  $\geq 2.14$ ) relative to ones  
319 that did not (SV doublings  $< 2.14$ ) ( $p < 0.02$ , Mann-Whitney U test) (Fig. 4B). This  
320 difference in abundance increased over time in the artificial gut system ( $\rho = 0.80$ ,  $p <$   
321  $1e-4$ , Spearman correlation) (Fig. 4C). Still, some SVs grew well in droplets, but did not  
322 persist in the artificial gut (left-most points of upper bar in Fig. 4B); or, by contrast, did  
323 not grow in droplets, but were relatively abundant in the artificial gut (right-most points of  
324 lower bar in Fig. 4B). The former may represent examples of SVs that are outcompeted  
325 in mixed culture, while the latter may be examples of SVs that depend on inter-species  
326 interactions to persist.

327

## 328 **Discussion**

329           We report here a microfluidic platform for isolating, culturing, and assaying  
330 component members of human gut microbiota (MicDrop) using accessible microfluidic  
331 and molecular techniques. We used MicDrop to compare the growth kinetics of dozens  
332 of microbial SVs to the dynamics of an artificial gut community and to examine inter-  
333 individual variation in gut bacterial polysaccharide metabolism. The flexibility of the  
334 platform suggests its underlying concepts could be applied to assaying microbial  
335 responses to other compounds including pharmaceuticals, antibiotics, or host-secreted

336 compounds<sup>18,61</sup> using individual members of communities comprised of microbes from  
337 culture collections, mutant libraries, other human body sites, or environmental systems.  
338 The ability of MicDrop to screen clonal populations could be particularly useful for  
339 assays characterizing the behavior of isolates free from the effects of inter-species  
340 interactions like competition or facilitation<sup>17,18</sup>.

341         Yet, we acknowledge MicDrop still has some limitations. We rely on 16S rRNA as  
342 a molecular barcode for droplets sharing the same bacterial SV, meaning that the  
343 platform is sensitive to similar challenges due to inter-species rRNA copy number  
344 variation confronting 16S rRNA microbiota surveys<sup>62</sup>; and MicDrop cannot detect  
345 differences in growth originating from distinct clones of the same SV. For precise growth  
346 assays targeting bacteria from a limited number of taxa, traditional culture methods  
347 could be better suited. An additional limitation of MicDrop in its current form is the time  
348 and manual effort needed to setup individual droplet generation experiments and  
349 ensure accurate Poisson dilution of bacterial cells. Experimental effort could be reduced  
350 and reproducibility enhanced by automating sample switching. Last, we focused here on  
351 culture in liquid media using soluble substrates; future extensions of MicDrop that  
352 provide solid physical surfaces to colonize<sup>63,64</sup> or insoluble substrates like mucin will  
353 require developing techniques to avoid the clogging of microfluidic channels.

354         Still, in its present form, MicDrop enabled useful insights into human gut  
355 microbiology. Our findings that bacterial SV growth in isolation is associated with  
356 persistence in an artificial gut supports the ecological hypotheses that intrinsic lifestyle  
357 characteristics of bacteria shape overall community dynamics. Indeed, species' growth  
358 rate (measured by 16S rRNA copy number) is positively correlated with microbes'

359 relative abundance in seawater<sup>65</sup>, as well as skin microbiota of amphibians<sup>66</sup>.  
360 Additionally, our microfluidic investigation of prebiotic response supports hypotheses  
361 that inter-individual variation to carbohydrate interventions is due to differential  
362 abundances of polysaccharide degrading bacteria between people<sup>43,67</sup>. Droplet  
363 microfluidics could be used in the future to stratify human populations into groups most  
364 likely to benefit from prebiotic treatments<sup>41</sup>, by providing a culture-based diagnostic  
365 approach capable of scaling to the diversity of microbes inhabiting the human gut.  
366

367 **References**

- 368
- 369 1. Kendall, A.I. Some observations on the study of the intestinal bacteria. *Journal of*  
370 *Biological Chemistry* **6**, 499-507 (1909).
  - 371 2. Rajilic-Stojanovic, M. & de Vos, W.M. The first 1000 cultured species of the  
372 human gastrointestinal microbiota. *FEMS microbiology reviews* **38**, 996-1047  
373 (2014).
  - 374 3. Le Barz, M. et al. In vivo screening of multiple bacterial strains identifies  
375 *Lactobacillus rhamnosus* Lb102 and *Bifidobacterium animalis* ssp. *lactis* Bf141  
376 as probiotics that improve metabolic disorders in a mouse model of obesity.  
377 *FASEB journal : official publication of the Federation of American Societies for*  
378 *Experimental Biology* **4**, 4921-4935 (2018).
  - 379 4. Zegarra-Ruiz, D.F. et al. A Diet-Sensitive Commensal *Lactobacillus* Strain  
380 Mediates TLR7-Dependent Systemic Autoimmunity. *Cell host & microbe* (2018).
  - 381 5. Mathewson, N.D. et al. Gut microbiome-derived metabolites modulate intestinal  
382 epithelial cell damage and mitigate graft-versus-host disease. *Nature*  
383 *immunology* **17**, 505-513 (2016).
  - 384 6. Larsbrink, J. et al. A discrete genetic locus confers xyloglucan metabolism in  
385 select human gut Bacteroidetes. *Nature* **506**, 498-502 (2014).
  - 386 7. Whiteside, S.A., Razvi, H., Dave, S., Reid, G. & Burton, J.P. The microbiome of  
387 the urinary tract--a role beyond infection. *Nat Rev Urol* **12**, 81-90 (2015).
  - 388 8. Buffie, C.G. et al. Precision microbiome reconstitution restores bile acid mediated  
389 resistance to *Clostridium difficile*. *Nature* (2014).
  - 390 9. Routy, B. et al. The gut microbiota influences anticancer immunosurveillance and  
391 general health. *Nat Rev Clin Oncol* **15**, 382-396 (2018).
  - 392 10. Eckburg, P.B. et al. Diversity of the human intestinal microbial flora. *Science* **308**,  
393 1635-1638 (2005).
  - 394 11. Human Microbiome Project, C. Structure, function and diversity of the healthy  
395 human microbiome. *Nature* **486**, 207-214 (2012).
  - 396 12. Yatsunenko, T. et al. Human gut microbiome viewed across age and geography.  
397 *Nature* **486**, 222-227 (2012).
  - 398 13. De Filippo, C. et al. Impact of diet in shaping gut microbiota revealed by a  
399 comparative study in children from Europe and rural Africa. *Proceedings of the*  
400 *National Academy of Sciences of the United States of America* **107**, 14691-  
401 14696 (2010).
  - 402 14. Faith, J.J. et al. The long-term stability of the human gut microbiota. *Science* **341**,  
403 1237439 (2013).
  - 404 15. Goodman, A.L. et al. Extensive personal human gut microbiota culture  
405 collections characterized and manipulated in gnotobiotic mice. *Proceedings of*  
406 *the National Academy of Sciences of the United States of America* **108**, 6252-  
407 6257 (2011).
  - 408 16. Lagier, J.C. et al. The rebirth of culture in microbiology through the example of  
409 culturomics to study human gut microbiota. *Clinical microbiology reviews* **28**,  
410 237-264 (2015).

- 411 17. Desai, M.S. et al. A Dietary Fiber-Deprived Gut Microbiota Degrades the Colonic  
412 Mucus Barrier and Enhances Pathogen Susceptibility. *Cell* **167**, 1339-1353  
413 (2016).
- 414 18. Maier, L. et al. Extensive impact of non-antibiotic drugs on human gut bacteria.  
415 *Nature* **555**, 623-628 (2018).
- 416 19. Martin, K. et al. Generation of larger numbers of separated microbial populations  
417 by cultivation in segmented-flow microdevices. *Lab on a chip* **3**, 202-207 (2003).
- 418 20. Ma, L. et al. Gene-targeted microfluidic cultivation validated by isolation of a gut  
419 bacterium listed in Human Microbiome Project's Most Wanted taxa. *Proceedings*  
420 *of the National Academy of Sciences of the United States of America* **111**, 9768-  
421 9773 (2014).
- 422 21. Nichols, D. et al. Use of ichip for high-throughput in situ cultivation of  
423 "uncultivable" microbial species. *Applied and environmental microbiology* **76**,  
424 2445-2450 (2010).
- 425 22. Kaminski, T.S., Scheler, O. & Garstecki, P. Droplet microfluidics for microbiology:  
426 techniques, applications and challenges. *Lab on a chip* **16**, 2168-2187 (2016).
- 427 23. Guo, M.T., Rotem, A., Heyman, J.A. & Weitz, D.A. Droplet microfluidics for high-  
428 throughput biological assays. *Lab on a chip* **12**, 2146-2155 (2012).
- 429 24. Zengler, K. et al. Cultivating the uncultured. *Proceedings of the National*  
430 *Academy of Sciences of the United States of America* **99**, 15681-15686 (2002).
- 431 25. Liu, W., Kim, H.J., Lucchetta, E.M., Du, W. & Ismagilov, R.F. Isolation,  
432 incubation, and parallel functional testing and identification by FISH of rare  
433 microbial single-copy cells from multi-species mixtures using the combination of  
434 chemistode and stochastic confinement. *Lab on a chip* **9**, 2153-2162 (2009).
- 435 26. Park, J., Kerner, A., Burns, M.A. & Lin, X.N. Microdroplet-enabled highly parallel  
436 co-cultivation of microbial communities. *PloS one* **6**, e17019 (2011).
- 437 27. Huang, S. et al. Dynamic control and quantification of bacterial population  
438 dynamics in droplets. *Biomaterials* **61**, 239-245 (2015).
- 439 28. Terekhov, S.S. et al. Ultrahigh-throughput functional profiling of microbiota  
440 communities. *Proceedings of the National Academy of Sciences of the United*  
441 *States of America* **115**, 9551-9556 (2018).
- 442 29. Terekhov, S.S. et al. Microfluidic droplet platform for ultrahigh-throughput single-  
443 cell screening of biodiversity. *Proceedings of the National Academy of Sciences*  
444 *of the United States of America* **114**, 2550-2555 (2017).
- 445 30. Browne, H.P. et al. Culturing of 'unculturable' human microbiota reveals novel  
446 taxa and extensive sporulation. *Nature* **533**, 543-546 (2016).
- 447 31. Callahan, B.J. et al. DADA2: High-resolution sample inference from Illumina  
448 amplicon data. *Nature methods* **13**, 581-583 (2016).
- 449 32. Najah, M., Griffiths, A.D. & Ryckelynck, M. Teaching single-cell digital analysis  
450 using droplet-based microfluidics. *Analytical chemistry* **84**, 1202-1209 (2012).
- 451 33. Martens, E.C., Chiang, H.C. & Gordon, J.I. Mucosal glycan foraging enhances  
452 fitness and transmission of a saccharolytic human gut bacterial symbiont. *Cell*  
453 *host & microbe* **4**, 447-457 (2008).
- 454 34. El Kaoutari, A., Armougom, F., Gordon, J.I., Raoult, D. & Henrissat, B. The  
455 abundance and variety of carbohydrate-active enzymes in the human gut  
456 microbiota. *Nature Reviews Microbiology* **11**, 497-504 (2013).



- 457 35. Ze, X., Duncan, S.H., Louis, P. & Flint, H.J. Ruminococcus bromii is a keystone  
458 species for the degradation of resistant starch in the human colon. *The ISME*  
459 *journal* **6**, 1535 (2012).
- 460 36. Slavin, J. Fiber and Prebiotics: Mechanisms and Health Benefits. *Nutrients* **5**,  
461 1417-1435 (2013).
- 462 37. Kamada, N. et al. Regulated virulence controls the ability of a pathogen to  
463 compete with the gut microbiota. *Science* **336**, 1325-1329 (2012).
- 464 38. Rakoff-Nahoum, S., Coyne, M.J. & Comstock, L.E. An ecological network of  
465 polysaccharide utilization among human intestinal symbionts. *Current biology* :  
466 *CB* **24**, 40-49 (2014).
- 467 39. Furusawa, Y. et al. Commensal microbe-derived butyrate induces the  
468 differentiation of colonic regulatory T cells. *Nature* **504**, 446-450 (2013).
- 469 40. Makki, K., Deehan, E.C., Walter, J. & Backhed, F. The Impact of Dietary Fiber on  
470 Gut Microbiota in Host Health and Disease. *Cell host & microbe* **23**, 705-715  
471 (2018).
- 472 41. Venkataraman, A. et al. Variable responses of human microbiomes to dietary  
473 supplementation with resistant starch. *Microbiome* **4** (2016).
- 474 42. Martinez, I., Kim, J., Duffy, P.R., Schlegel, V.L. & Walter, J. Resistant Starches  
475 Types 2 and 4 Have Differential Effects on the Composition of the Fecal  
476 Microbiota in Human Subjects. *PloS one* **5** (2010).
- 477 43. Walker, A.W. et al. Dominant and diet-responsive groups of bacteria within the  
478 human colonic microbiota. *Isme Journal* **5**, 220-230 (2011).
- 479 44. Chu, N.D., Smith, M.B., Perrotta, A.R., Kassam, Z. & Alm, E.J. Profiling Living  
480 Bacteria Informs Preparation of Fecal Microbiota Transplantations. *PloS one* **12**,  
481 e0170922 (2017).
- 482 45. Magnusdottir, S. et al. Generation of genome-scale metabolic reconstructions for  
483 773 members of the human gut microbiota. *Nature biotechnology* **35**, 81-89  
484 (2017).
- 485 46. Noronha, A. et al. The Virtual Metabolic Human database: integrating human and  
486 gut microbiome metabolism with nutrition and disease. *Nucleic acids research*  
487 **47**, D614-D624 (2019).
- 488 47. Newton, D.F., Macfarlane, S. & Macfarlane, G.T. Effects of antibiotics on  
489 bacterial species composition and metabolic activities in chemostats containing  
490 defined populations of human gut microorganisms. *Antimicrobial agents and*  
491 *chemotherapy* **57**, 2016-2025 (2013).
- 492 48. Gamage, H. et al. Cereal products derived from wheat, sorghum, rice and oats  
493 alter the infant gut microbiota in vitro. *Scientific reports* **7**, 14312 (2017).
- 494 49. Ichim, T.E., Kesari, S. & Shafer, K. Protection from chemotherapy- and antibiotic-  
495 mediated dysbiosis of the gut microbiota by a probiotic with digestive enzymes  
496 supplement. *Oncotarget* **9**, 30919-30935 (2018).
- 497 50. Rajilic-Stojanovic, M. et al. Evaluating the microbial diversity of an in vitro model  
498 of the human large intestine by phylogenetic microarray analysis. *Microbiology*  
499 **156**, 3270-3281 (2010).
- 500 51. McDonald, J.A. et al. Evaluation of microbial community reproducibility, stability  
501 and composition in a human distal gut chemostat model. *J Microbiol Methods* **95**,  
502 167-174 (2013).

- 503 52. Van den Abbeele, P. et al. Microbial Community Development in a Dynamic Gut  
504 Model Is Reproducible, Colon Region Specific, and Selective for Bacteroidetes  
505 and Clostridium Cluster IX. *Applied and environmental microbiology* **76**, 5237-  
506 5246 (2010).
- 507 53. Auchtung, J.M., Robinson, C.D. & Britton, R.A. Cultivation of stable, reproducible  
508 microbial communities from different fecal donors using minibioreactor arrays  
509 (MBRAs). *Microbiome* **3**, 42 (2015).
- 510 54. Tramontano, M. et al. Nutritional preferences of human gut bacteria reveal their  
511 metabolic idiosyncrasies. *Nat Microbiol* **3**, 514-522 (2018).
- 512 55. Freeman, J., O'Neill, F.J. & Wilcox, M.H. Effects of cefotaxime and  
513 desacetylcefotaxime upon *Clostridium difficile* proliferation and toxin production  
514 in a triple-stage chemostat model of the human gut. *J Antimicrob Chemoth* **52**,  
515 96-102 (2003).
- 516 56. Macfarlane, G.T., Macfarlane, S. & Gibson, G.R. Validation of a Three-Stage  
517 Compound Continuous Culture System for Investigating the Effect of Retention  
518 Time on the Ecology and Metabolism of Bacteria in the Human Colon. *Microbial  
519 ecology* **35**, 180-187 (1998).
- 520 57. Silverman, J.D., Durand, H.K., Bloom, R.J., Mukherjee, S. & David, L.A. Dynamic  
521 linear models guide design and analysis of microbiota studies within artificial  
522 human guts. *Microbiome* **6**, 202 (2018).
- 523 58. Reese, A.T. et al. Antibiotic-induced changes in the microbiota disrupt redox  
524 dynamics in the gut. *eLife* **7** (2018).
- 525 59. Rettedal, E.A., Gumpert, H. & Sommer, M.O. Cultivation-based multiplex  
526 phenotyping of human gut microbiota allows targeted recovery of previously  
527 uncultured bacteria. *Nat Commun* **5**, 4714 (2014).
- 528 60. Lagier, J.C. et al. Microbial culturomics: paradigm shift in the human gut  
529 microbiome study. *Clinical microbiology and infection : the official publication of  
530 the European Society of Clinical Microbiology and Infectious Diseases* **18**, 1185-  
531 1193 (2012).
- 532 61. Koppel, N., Maini Rekdal, V. & Balskus, E.P. Chemical transformation of  
533 xenobiotics by the human gut microbiota. *Science* **356** (2017).
- 534 62. Kembel, S.W., Wu, M., Eisen, J.A. & Green, J.L. Incorporating 16S gene copy  
535 number information improves estimates of microbial diversity and abundance.  
536 *PLoS computational biology* **8**, e1002743 (2012).
- 537 63. Macfarlane, S., Woodmansey, E.J. & Macfarlane, G.T. Colonization of mucin by  
538 human intestinal bacteria and establishment of biofilm communities in a two-  
539 stage continuous culture system. *Applied and environmental microbiology* **71**,  
540 7483-7492 (2005).
- 541 64. Datta, M.S., Sliwerska, E., Gore, J., Polz, M.F. & Cordero, O.X. Microbial  
542 interactions lead to rapid micro-scale successions on model marine particles.  
543 *Nature communications* **7**, 11965 (2016).
- 544 65. Campbell, B.J. & Kirchman, D.L. Bacterial diversity, community structure and  
545 potential growth rates along an estuarine salinity gradient. *The ISME journal* **7**,  
546 210-220 (2013).



- 547 66. Prest, T.L., Kimball, A.K., Kueneman, J.G. & McKenzie, V.J. Host-associated  
548 bacterial community succession during amphibian development. *Molecular*  
549 *ecology* **27**, 1992-2006 (2018).
- 550 67. Kovatcheva-Datchary, P. et al. Dietary Fiber-Induced Improvement in Glucose  
551 Metabolism Is Associated with Increased Abundance of *Prevotella*. *Cell*  
552 *Metabolism* **22**, 971-982 (2015).
- 553 68. Caporaso, J.G. et al. Global patterns of 16S rRNA diversity at a depth of millions  
554 of sequences per sample. *Proceedings of the National Academy of Sciences of*  
555 *the United States of America* **108**, 4516-4522 (2011).
- 556 69. Maurice, C.F., Haiser, H.J. & Turnbaugh, P.J. Xenobiotics shape the physiology  
557 and gene expression of the active human gut microbiome. *Cell* **152**, 39-50  
558 (2013).
- 559 70. Caporaso, J.G. et al. QIIME allows analysis of high-throughput community  
560 sequencing data. *Nat Methods* **7**, 335-336 (2010).
- 561 71. Wang, Q., Garrity, G.M., Tiedje, J.M. & Cole, J.R. Naive Bayesian classifier for  
562 rapid assignment of rRNA sequences into the new bacterial taxonomy. *Applied*  
563 *and environmental microbiology* **73**, 5261-5267 (2007).
- 564 72. Quast, C. et al. The SILVA ribosomal RNA gene database project: improved data  
565 processing and web-based tools. *Nucleic acids research* **41**, D590-D596 (2013).
- 566 73. Zwietering, M.H., Jongenburger, I., Rombouts, F.M. & van 't Riet, K. Modeling of  
567 the bacterial growth curve. *Applied and environmental microbiology* **56**, 1875-  
568 1881 (1990).
- 569 74. Sottile, W., 2nd & Zabransky, R.J. Comparative growth rates of selected  
570 anaerobic species in four commonly used broth media. *Antimicrobial agents and*  
571 *chemotherapy* **11**, 482-490 (1977).
- 572 75. Monod, J. The Growth of Bacterial Cultures. *Annual review of microbiology* **3**,  
573 371-394 (1949).
- 574 76. Reese, A.T. et al. Microbial nitrogen limitation in the mammalian large intestine.  
575 *Nat Microbiol* **3**, 1441-1450 (2018).
- 576 77. Bochner, B.R., Gadzinski, P., & Panomitros E. Phenotype microarrays for high-  
577 throughput phenotypic testing and assay of gene function. *Genome Research* **11**,  
578 1246-1255 (2001)
- 579 78. Magnúsdóttir, S. et al. Generation of genome-scale metabolic reconstructions for  
580 773 members of the human gut microbiota. *Nature Biotechnology*, 81-89 (2017).  
581

## 582 **EXPERIMENTAL PROCEDURES**

583

### 584 **Overall MicDrop procedure**

585 Droplets were made on a microfluidic chip (6-junction droplet chip, Dolomite  
586 Microfluidics). Bacterial media varied by assay; for the oil phase, we used a fluorinated  
587 oil and surfactant mixture 1% Picosurf (Sphere Fluidics) in Novec 7500 (3M). One day

588 prior to performing the droplet assay, all reagents including carrier oil, culture media,  
589 and carbon solutions were equilibrated to the anaerobic atmosphere in an anaerobic  
590 chamber (Coy). The fecal inoculum optical density at 600 nm was recorded and diluted  
591 according to the Poisson distribution:  $P(n, \bar{n}) = \frac{\bar{n}^n e^{-\bar{n}}}{n!}$ , where  $n$  is the droplet occupancy  
592 (i.e. 0, 1, .. cells/droplet) and  $\bar{n}$  is the average number of cells per droplet given by:  $\bar{n} =$   
593  $\rho V$ , where  $V$  is droplet volume and  $\rho$  is cell density. Assays were performed at a  $\bar{n}$  of  
594 0.1-0.3 to minimize the number of droplets loaded with more than one cell  
595 (Supplementary Fig. 1). Thus, for a fixed droplet volume and  $\bar{n}$ , the target cell  
596 concentration can be obtained from:  $\rho = K \frac{\bar{n}}{V}$ , where  $K$  is a constant that converts  
597 CFUs/mL to OD<sub>600</sub> determined from replicate CFU assays. Syringe pumps were used  
598 to control the flow rates of the oil and cell suspension (NE-1000 Single Syringe Pump,  
599 New Era Pump Systems). Following the culture period, droplets were loaded into  
600 chambered slides (C10283, Invitrogen) or directly onto glass slides and observed with  
601 Phase and/or Darkfield microscopy (Nikon) to examine growth and the appropriate  
602 loading. All steps of cell encapsulation and culture were performed in an anaerobic  
603 chamber.

604

## 605 **Collection and preparation of fecal inoculum for artificial gut and MicDrop growth** 606 **dynamics assays**

607 Stool was collected from human donors under a protocol approved by the Duke  
608 Health Institutional Review Board (Duke Health IRB Pro00049498). Inclusion criteria  
609 limited this study to healthy subjects who could provide fecal samples at no risk to  
610 themselves, had no acute enteric illness (e.g. diarrhea) and had not taken antibiotics in

611 the past month. Fresh stool samples were collected in a disposable commode specimen  
612 container (Fisher Scientific, Hampton NH). Intact stool was moved within roughly 15  
613 minutes of bowel movement into anaerobic conditions. The sample was prepared for  
614 inoculation in an anaerobic chamber (Coy). A 5 g stool aliquot was weighed into a 7 oz  
615 filtration bag (Nasco Whirl-Pak) and combined with 50 mL of mGAM media (Gifu  
616 Anaerobic Medium, HiMedia, with the addition of 5 mg/L Vitamin K and 10 mg/L Hemin,  
617 <sup>59</sup>) that was pre-reduced overnight in an anaerobic chamber. The mixture was  
618 homogenized in a stomacher (Seward Stomacher 80) on normal speed for 1 minute  
619 under atmospheric conditions to make a total of 100 mL of inoculum. The supernatant  
620 was decanted into beakers and loaded into syringes for inoculation into the artificial gut  
621 or filtered through a 50  $\mu$ m filter (Celltrics) and diluted and loaded into droplets.

622

### 623 **Droplet DNA extraction, PCR amplification, and DNA sequencing**

624 To extract DNA from droplets, excess oil was removed by pipetting and water-in-  
625 oil emulsions were broken by adding an equal amount of 1H,1H,2H,2H-Perfluoro-1-  
626 octanol (PFO, VWR) and briefly vortexed. Then, the samples were briefly centrifuged  
627 (<200 g) to separate the aqueous and oil phases by density. The aqueous solution was  
628 transferred to a new tube, and DNA was extracted using a kit (Qiagen #12224). DNA  
629 was extracted from artificial gut and stool samples using a 96-well PowerSoil kit (Qiagen  
630 #12888). For all samples, the V4 region of the 16S rRNA gene was barcoded and  
631 amplified from extracted DNA using with custom barcoded primers, using published  
632 protocols<sup>68,69</sup>. 16S rRNA amplicon sequencing was performed on an Illumina MiniSeq  
633 with paired-end 150 bp reads. We chose to only analyze samples with more than 5,000

634 reads to remove outlying samples that may have been subject to library preparation or  
635 sequencing artifacts. The 16S rRNA nucleotide sequences generated in this study will  
636 be made available at the European Nucleotide Archive under study accession number  
637 TBD. Total bacterial abundances from droplet cultures were estimated by qPCR for  
638 bacterial 16S rRNA using the same primers used in the DNA sequencing protocol.  
639 Amplification during the qPCR process was measured with a Real-Time PCR system  
640 (CFX96 Real-Time System, BioRad) using *E. coli* DNA at a known cell concentration as  
641 a reference.

642

### 643 **Identifying Sequence Variants and Taxonomy assignment**

644 DADA2 was used to identify SVs<sup>31</sup>. Custom scripts were used to prepare data for  
645 denoising with DADA2 as previously described<sup>57</sup>. Reads were then demultiplexed using  
646 scripts in Qiime v1.9<sup>70</sup>. SVs were inferred by DADA2 using error profiles learned from a  
647 random subset of 40 samples from each sequencing run. Bimeras were removed using  
648 the function `removeBimeraDenovo` with `tableMethod` set to “consensus”. Taxonomy was  
649 assigned to sequence variants using a Naïve Bayes classifier<sup>71</sup> trained using version  
650 123 of the SILVA database<sup>72</sup>. For growth dynamics of the human gut microbiota and  
651 microbiota dynamics in the artificial gut, only forward sequencing reads were analyzed.  
652 Downstream analysis on sequence variant tables was performed using R (ver. 3.4.2)  
653 and Python (ver. 2.7.6). PERMANOVA was run in R using `adonis` in the `vegan` package  
654 (ver. 2.5-2).

655

### 656 **Growth dynamics of human gut microbiota**

657 To estimate SV growth curves using MicDrop, we collected a total of 70 separate  
658 microfluidic droplet aliquots for destructive longitudinal sampling. Droplets were  
659 generated according to the MicDrop protocol described above. We used a modified Gifu  
660 Anaerobic Medium (mGAM) in our droplets (Gifu Anaerobic Medium, HiMedia, with the  
661 addition of 5 mg/L Vitamin K and 10 mg/L Hemin). Each aliquot of 200  $\mu$ l of droplets  
662 was incubated at 37 °C in an anaerobic chamber. Aliquots were destructively sampled  
663 in triplicate, hourly, for hours 0-24 after droplet making and in duplicate once a day for  
664 hours 24-127 after droplet making.

665 Growth curves were fit using a combination of 16S rRNA qPCR and DNA  
666 sequencing data. To minimize the potential for poorly fit growth curves, SVs were  
667 required to have been detected by DNA sequencing in >5 samples to be included in  
668 curve fitting. To avoid numerical instabilities associated with taking the log or dividing by  
669 zero, a pseudocount of one was added to the sequence variant count table prior to  
670 normalization to relative abundances. Relative abundances of each SV were then  
671 determined by dividing the number of counts associated with each SV in each sample  
672 by the total read counts in the sample. Concentrations of each taxa were then estimated  
673 by multiplying the relative abundances of SVs by the 16S rRNA concentrations  
674 determined by qPCR. Technical replicates constituted distinct data points in these  
675 calculations. We used the SciPy Python package (v0.19.1) to fit a modified Gompertz  
676 equation<sup>73</sup> to which we added an additional term to account for differences in starting  
677 abundance to the resulting dataset:  $y = A \exp \left\{ -\exp \left[ \frac{\mu \cdot e}{A} (\lambda - t) + 1 \right] \right\} + A_0$ , where  $\mu$  is  
678 growth rate,  $A$  is carrying capacity,  $\lambda$  is lag time, or the time it takes for a bacteria to  
679 reach logarithmic growth, and  $A_0$  accounts for the relative abundance of different SVs in

680 the inoculum. We fit curves using the module `scipy.optimize.least_squares` with the  
681 robust loss function “`soft_l1`”. Parameter bounds were also used to minimize the  
682 optimization search space. We set lower bounds of  $A=0$ ,  $\lambda=-50$ ,  $\mu=0$ ,  $A_0=0$ ; and, upper  
683 bounds of  $A=15$ ,  $\lambda=12$ ,  $\mu=2.6$ ,  $A_0=15$ . We selected bounds by considering both  
684 biological feasibility and parameter sensitivity analyses (Supplementary Fig. 12). Our  
685 upper bound for growth rate ( $\mu=2.6$ ) represented a doubling time of 15 minutes, which  
686 we based on the fastest growth rates observed in an anaerobic bacterium<sup>74</sup>. The upper  
687 bounds on  $A$  and  $A_0$  were set to the maximum amount of DNA measured across  
688 replicate MicDrop samples from the human fecal inoculum. The upper bound on  $\lambda$ ,  
689 which represents the lag time until exponential growth<sup>75</sup> was set at 12. Lower bounds of  
690 0 for  $A$ ,  $A_0$ , and  $\mu$  reflect our choice not to model negative growth. A lower bound for  $\lambda$   
691 was selected by sensitivity analysis (Supplementary Fig. 12), which revealed that a  
692 bound of zero led to fitted  $\lambda$  values regularly collapsing to our boundary limits. We also  
693 found that fitted curves were sensitive to starting parameters. To ensure a broad search  
694 of parameter space, we initialized each curve fit multiple times ( $n=100$ ) with starting  
695 parameters randomly distributed between the bounds of each parameter. Fitted growth  
696 rates often collapsed to the maximum  $\mu$  tolerated; we therefore only retained fits where  
697 growth rates were at least slightly below our upper bound for  $\mu$  ( $\mu < 2.5$ ) (Supplementary  
698 Fig. 13). Of the remaining fitted curves, we analyzed the one with the lowest loss  
699 function. In our analyses of SV growth in human fecal samples, we defined total SV  
700 levels as  $y(127 \text{ hours}) - y(0 \text{ hours})$ .

701

702 **Microbiota dynamics in an artificial human gut**

703 We cultured human gut microbiota with an artificial gut model that we have used in prior  
704 studies<sup>57,76</sup>. A continuous-flow artificial gut system (Multifors 2, Infors) was used to  
705 culture gut microbiota seeded from human stool. A vessel was autoclave-sterilized and  
706 prepared with 300 mL of mGAM media (see *Growth dynamics of human gut microbiota*  
707 above). We inoculated the vessel with 100 mL of fecal inoculum, resulting in a total  
708 culture volume of 400 mL. After 24 hours, the media feed was initiated at a constant  
709 rate of 400 mL per day. A carboy feeding the media was changed once over the course  
710 of the 14 days. Feed rate, oxygen, pH, temperature, and stir rate were all controlled by  
711 software (IRIS v6, Infors). Positive pressure within the vessels was maintained to  
712 prevent contamination by sparging with nitrogen at 1 LPM. Dissolved oxygen  
713 concentration was measured continuously using Hamilton VisiFerm DO Arc 225 probes.  
714 pH was monitored with Hamilton EasyFerm Plus PH ARC 225 probes and was  
715 maintained between 6.9 and 7.1 using a 1 N HCl solution and a 1 N H<sub>3</sub>PO<sub>4</sub> solution.  
716 The vessel was maintained at 37°C via the Infors' onboard temperature control system.  
717 The vessel was continuously stirred at 100 rpm using magnetic impeller stir-shafts.  
718 Samples were taken once every 24 hours between 1 PM and 5 PM for 14 days and  
719 were frozen immediately at -80°C for later extraction.

720

### 721 **MicDrop Prebiotic Assay**

722 Microbial communities isolated from human stool samples were tested for carbohydrate  
723 consumption using the MicDrop platform. Cells were revived from frozen stock in rich  
724 medium (mGAM, see *Growth dynamics of human gut microbiota*) for 18 hours to allow  
725 cells to recover from freezing. Bacteria were then cultured in minimal medium



726 (Supplementary Table 6) containing glucose and galactose (Sigma) as the sole carbon  
727 sources to deplete excess nutrients<sup>77</sup>. Following determination of the loading  
728 concentration, the bacteria were washed twice by centrifugation (2 min at 14,000 g) to  
729 remove free monosaccharides and resuspended in 2X minimal medium without a  
730 carbon source. Bacteria were filtered using a 50 µm filter (CellTrics, Sysmex) to remove  
731 multi-cell clumps. The filtered microbiota suspension was then added to prebiotics in a  
732 50:50 mixture of 1% prebiotic solution and 2X minimal medium. To prevent chip fouling  
733 during droplet generation, the oil inlet was equipped with 10 µm inline filters (P-276,  
734 IDEX). Droplet generation in the anaerobic chamber was monitored using a bright field  
735 microscope (Celestron). Droplet cultures were stored in 5 mL polypropylene tubes  
736 (Falcon) with the caps closed in an anaerobic incubator at 37 °C. Following the second  
737 day of incubation, cultures were moved to a -20 °C freezer for storage prior to DNA  
738 extraction.

739

#### 740 **Validation of prebiotic utilization assays**

741 To validate the MicDrop prebiotic assay, we generated reference data on carbohydrate  
742 preferences using an artificial community of seven wild-type gut isolates from our  
743 culture collection (Supplementary Table 7), which were grown in both 96-well plates and  
744 the MicDrop Prebiotic Assay described in the preceding paragraph. Following the same  
745 procedure described in the *MicDrop Prebiotic Assay*, well plates were prepared with  
746 minimal medium (Supplementary Table 6) and a carbohydrate as a sole carbon source  
747 (Supplementary Table 8). A 10 µL aliquot of bacterial suspension was added to 200 µL  
748 of medium in 96-well plates and incubated in a humidified container for two days at 37



749 °C. All culture experiments were performed in an anaerobic chamber. Following the  
750 culture period, the optical density at 600 nm of each well was examined using a plate  
751 reader (CLARIOstar, BMG Labtech). Following published protocols<sup>17</sup>, isolate growth in  
752 plates was normalized to the maximum growth for each microbe. To classify isolates as  
753 either “growing” or “not-growing,” a threshold of 20% of maximum growth was applied to  
754 the plate data, above which was considered growth on the carbon source of interest.  
755 The same isolates used in the well-plate analyses were mixed evenly into an artificial  
756 community and examined using the MicDrop prebiotic assay described above. MicDrop  
757 experiments were performed in triplicate. Growth thresholds for the MicDrop assay were  
758 determined by first pre-processing sample qPCR values to zero if they indicated overall  
759 growth below mean no-carbon controls. Then, relative SV abundance data were  
760 converted to absolute SV abundances by multiplying each sample by the corresponding  
761 qPCR value. Median SV abundances were then calculated across replicates and SV  
762 abundances from matched no-carbon controls were subtracted from each sample. An  
763 optimal SV growth threshold for determining growth on a carbohydrate in MicDrop was  
764 determined by applying Youden’s J index across all possible threshold values, with the  
765 well-plate data as the reference (Supplementary Fig. 9). A growth threshold of 88%  
766 maximized this index and was used in subsequent experiments on fecal samples.  
767

#### 768 **MicDrop prebiotic assays using human stool samples**

769 Stool samples were collected from nine healthy donors (7 men, 2 women) between the  
770 ages of 35-53 under the IRB protocol described in section *Collection and preparation of*  
771 *fecal inoculum for artificial gut and MicDrop growth dynamics assays*. To facilitate

772 carrying out prebiotic assays simultaneously across a range of donors, we used frozen  
773 gut microbiota in these experiments. Fecal slurries were made at 10% w/v using mGAM  
774 medium and a stomacher (Seward) that homogenized fecal samples for one minute.  
775 Then, slurries were mixed 50:50 with 50% glycerol and stored at -80 °C for later use.  
776 Samples were assayed following the MicDrop prebiotic assay procedure described  
777 above.

778

### 779 **Comparison of primary degraders to the Virtual Metabolic Human database**

780 We compared the identity of primary degraders to carbon consumption profiles from the  
781 Virtual Metabolic Human (VMH) database<sup>46,78</sup>. We first mapped primary degraders to  
782 this database by taking SV 16S rRNA sequences from our study and searching for  
783 matches in the NCBI nucleotide database. Each 100% match was then linked to a type  
784 strain in the VMH database using NCBI taxonomy ids. Since some NCBI taxonomy IDs  
785 could be mapped to multiple strain IDs, we used an NCBI genome assembly file  
786 ([ftp://ftp.ncbi.nlm.nih.gov/genomes/ASSEMBLY\\_REPORTS/](ftp://ftp.ncbi.nlm.nih.gov/genomes/ASSEMBLY_REPORTS/)  
787 [assembly\\_summary\\_genbank.txt](ftp://ftp.ncbi.nlm.nih.gov/genomes/ASSEMBLY_REPORTS/assembly_summary_genbank.txt)) to perform more specific mappings; when more than  
788 one mapping was possible, we selected the strain with the oldest genome annotation  
789 (we reasoned that strains that were selected first for sequencing were also more likely  
790 to have more thorough experimental characterizations). Once SVs were mapped, we  
791 restricted our analysis to SVs that grew on a given carbohydrate in over half of the  
792 participants and where all BLAST matches to the VMH database had concordant  
793 prebiotic utilization annotations. Only consumption of xylan and inulin were examined  
794 since GOS and dextrin were not referenced in the VMH database. Permutation analysis

795 were carried out by randomly shuffling rows and columns of the droplet primary  
796 degrader table and repeating the analyses.

797

798

## 799 **Acknowledgements**

800 The authors would like to thank Christopher Mancuso and Ahmad S. Khalil, Ph.D., for  
801 their helpful comments on the manuscript. L.A.D. acknowledges support from the  
802 Global Probiotics Council, a Searle Scholars Award, an Alfred P. Sloan Research  
803 Fellowship, the Beckman Young Investigator program, the Translational Research  
804 Institute through Cooperative Agreement NNX16AO69A, the Damon Runyon Cancer  
805 Research Foundation, the UNC CGIBD (NIDDK P30DK034987), and NIH  
806 1R01DK116187-01. This work used a high-performance computing facility partially  
807 supported by grant 2016-IDG-1013 ("HARDAC+: Reproducible HPC for Next-  
808 generation Genomics") from the North Carolina Biotechnology Center. *E. coli* strain  
809 was provided by N. Lord and J. Paulsson. M.M.V. holds a Postdoctoral Enrichment  
810 Program Award from the Burroughs Wellcome Fund. This material is based upon work  
811 supported by the National Science Foundation Graduate Research Fellowship under  
812 Grant No. DGE-1644868 to R.J.B.

813

## 814 **Author contributions**

815 M.M.V., R.J.B., and L.A.D. developed the assay platform and designed the study.  
816 M.M.V., R.J.B., H.K.D, S.H., S.J. and A.W. performed the experiments. J.D.S.  
817 contributed software for bioinformatic analysis. M.M.V., R.J.B., and L.A.D. analyzed the

818 data. S.H. and L.Y. helped with design and data interpretation. M.M.V., R.J.B., and  
819 L.A.D. wrote the manuscript with feedback from all authors.

820

821

822 **Competing interests**

823 M.M.V., R.J.B., L.A.D., and Duke University have patents filed related to the droplet  
824 platform described herein (PCT/US20 17/045 608, 62/628 170). L.A.D. was a member  
825 of the Kaleido Biosciences Strategic Advisory Board and retains equity in the company.
